# Supplementary material for: Genetic Diversity of MHC B-F/B-L Region in 21 Chicken Populations
Source: Front Genet. 2021 Aug 13;12:710770. doi: 10.3389/fgene.2021.710770 (PMC8414643; doi:10.3389/fgene.2021.710770)
Supplement: Supplementary Table 1 — Primer design for chicken MHC BF/BL region using WaferGen Smartchip Platform. [file Table_1.XLSX]

## Sheet: 431_Primers
PrimerID	F_Primer	R_Primer
P11217_2	ACCAACATGTGTATGCATTTCTCTTTA	ATGGACACGGGTCAATCCTG
P11232_2	CTGATACCCAGATGGAGTCAGG	GGAGGCACAAATAGGGGTGT
P11248_1	TGGGAGGGCTCAGAGAAAGA	GCTTCACCCTCCCTTGGATC
P11263_1	AGCTTGAGTTGGTTCCCACA	CCAGGTTGGGTTACATGTGTG
P11279_1	TCTTTCTTTCTCTTTTTGAAGACAATCT	TCACGTTCCTCTGAAAGGGA
P11296_1	GCAGACTGCAATTATCATTCCCA	TCTGATGTGAGCTTTCCTTAAAACA
P11320_1	TTATGGCTTAGAATTGAAACTAATGTTCA	ACACCTGCTGTCATTCACCC
P11345_1	tttgtatgtatgtgtgtatgtgtgAAG	TCACCTGAAAGCAAAGGGAGA
P11363_1	ATTGAAAAGAACAAAAAGTTTGGAGAAA	TCAATTGATGCCAAAATCCCCC
P11386_1	ACCTGGGGCTTATTTTTGAGG	CCCTTCCCCAAATCAGAGGG
P11406_1	TTAATTTTCTTCTTTCTCTTCTCATTCCA	TAATGGCACCACTCACCCAG
P11434_1	tCCCTATTTGACAGGCAGACT	TCACGGAGCTTTGAGTCACG
P11452_1	CAGAGCTGCTGTCCTGGG	ACTGATTCAGGCAATACACCCA
P11467_2	GGATTTTCCTCAGTGTGCTCCT	TGCATCAGAAATCACTGTCAGTAGA
P11486_1	TGACATATTTTGTTCTATGATGCCCA	GTCCTAGAGCAAAGCTGACCT
P11501_2	TCCCTTTTTAGGCAAACTGACA	TCTGATGTCCTTTCAATGCTGAA
P11519_1	GCAAAGTGCGATGCAACGAT	GGACTCACCGAGTTCCACTG
P11543_1	TCTGCTCTCAGGACTGTTTACA	AGGATTTAGTTTTTAATCAGGTCAATGAA
P11576_1	CTGATTAAAAACTAAATCCTAAAGGCAGA	TGCAATTTCTTCCTTCCAAACGA
P11592_2	ACCCCCAATGGCTTTTCTCT	ACTTACCAACTTCTGCAGTGAGT
P11614_1	AGGGGAACTCACTGCAGAAG	AATCCCACGAATCTCAGCCC
P11633_1	TGTGCTGAAGCCACCAAAAA	ACGCTCAAACGTGGAGAAAT
P11651_1	TTCTACCTGGGGCCTTTTCC	AGAGAACAAACCCAGGGAGG
P11672_1	TCTCTTTATTTTAAGGGAAACACGCA	AGGTGATATTTTTGGCTCAAAATCCA
P11702_1	ttctttccttctttctttcCTTGGA	TCCACGTTGCATCATTGTGT
P11732_1	TCAAGAATCTTAGGATCAATAGTAACACA	TCTTCCAGCCCCAAATTGCT
P11756_1	AGGATTTCCCATAGAGAAAAACAGC	AAGAGATATTAGTTCAAAACAGCTCTCT
P11771_1	CACCTCGTTTTGGGTTCAGC	GCACCCTTTCCAAAGCACTG
P11788_2	ACTGAGCTGCTCGGTAAGTG	AGGTCATTTTTGGGGCAGACT
P11805_2	TTTGCAGAGGACCGCGATT	AGGATGTCCTGTTCTCCTAAAAATT
P11822_1	TCCTTGTTTATGTGCAAAACTGG	TCCATTTATTCCCCTTTTTCTCCA
P11841_2	GTGCTGCGATTGCTGGCA	ATCCTATTTCCCCATTCCCCC
P11859_1	AAAAATGGAATGAAATTTAGGGAGGG	CACCGAGCTCTTCTGACAGT
P11874_2	TCTCAGAGAGTTTGGTATCCTCG	GCACCAACTCATTGCTATCCC
P11891_1	CCTGCTTTGCCTCTTTGTGT	ACTCTCCTCTAGGAACAAAAAGGG
P11908_1	CTTTTAGAGGAATTAAGGGGTCGG	AGGGGGAAAAGAGAAAAGAAAGGA
P11925_2	TTGACTGAAGGAATAAGCATGCT	GACCTGATGTTGTGTTTGGGC
P11944_1	GCCAATGGGGTCATTTGGGA	CGGGATCCCTGAATGGTGAC
P11967_1	TTACTTCAGATCCCATTTTCAGGTT	ACCAGAGGTGTTATAACATACAGGT
P11983_2	AGAAGTTGGTGAGTATTTTTCTGCC	ACTTACCGAGCTCTGCAGTG
P12001_2	CAGAAGTGGACTTTGGTGTGT	ACTTCCTAAGGTTTGGCTCTCA
P12021_1	AGCAAACAATCACAAGGCACA	TGTAATTTCACCAATTTCAAACCAGT
P12036_1	CCTCATCTTCAGCACGTGAGA	ACTTACGAGGGGGTTAAATGAAAA
P12063_1	TTTTCATTTAACCCCCTCGTAAGT	TCGCCTCTCCCTAAAAATGCA
P12079_1	TTTTCTTTTTAGGAAGATGTTTTGAGGA	GGGGTCTGCAATACCTCCAC
P12095_1	TGGGTTTCTGCTTGCAGACC	GAGAGGACGAGGCGAGGG
P12111_1	CCTTGAGCTCCACGAAGACA	GCCCTTCTGTGAGATCCACC
P12131_1	CTTCGACGCCGATCCCTG	GCCCCATTCGTAGTCCAGAG
P12148_2	GCAGCAATGGGGGTTCAAGA	AGTTTTTCCACCCCGGTCTG
P12162_2	TCACTTTTCCTCTGACCTCCT	CAGGAGCCACCCCATACATC
P12178_1	AGGAAAAGCAGCATTAAAACCTCA	GGCATTGGATCCAGGGTAGG
P12199_1	GACATATGGGGTGGCTCCTG	CACCAGCAGAGCTTCTTTGC
P12216_2	CAGGGTAAGTCGCTGCCTAC	TCTCCTGGACTCTGGTTGGA
P12232_1	TGCTATCCATGTGGCCATCC	CTCCATGGGTTTAGGGCTCC
P12249_1	CAAGCTGGCATGATGCTCTG	TGGCCAAGAACATGCAGACA
P12265_2	CAGCTGCAATGGGAGGTAGG	CTATGAGCTGCAGAGGGGC
P12280_1	AAATCTTTTGCCCCACTGCG	TCCCCAACCCATTAAGCTGC
P12295_1	GCCTCTGCTCCACCTATTGC	ATGGTATTCTGAGCCGCTCC
P12313_1	GAGAGGATCCAAGCAGGGG	GCACAGGAACTCCTAGTTGC
P12330_1	TTTAATTGACTATCAACAGGGCGA	GTCATTATTGGCCACAGGGGA
P12348_2	TGCTATGGTGACTGAAGTAAGCA	AAAAGACACTCACCGCCAGG
P12367_1	GGCTGATATTTCCCTCTGTCCC	TCCCCCAAAACAGAACCCAA
P12388_2	GATCCACCTCTAGGGAGCAAG	GAAGGACTCAATCATCCTACCCA
P12406_2	GGCTGCACCAAGGTCTCTTT	GTTTTGGAAGGGATGAATCACCC
P12423_2	GGAGCCTTCAGTGGGATGAA	TCCATTGCCCATCTGATGCT
P12438_1	GCTGAACCCTTCTGTATTTTCACC	TTCAGCTTCTCTGCCAGGTG
P12459_1	GGAGATACCGAGGTCATCAGC	GGAATAACACAGGGCTGACCA
P12473_2	CGCAAGAGGACATTCCCCT	GGTTCTCCAGATCGCTGTGA
P12489_1	AGTCCAACACATTGCATCTCTTC	CCGTGTCTGTAGGTTGTGGA
P12506_2	TCTGGTAAGAAGCTGTTGCCT	AGATGAGGATGCCGAGGAGA
P12523_1	CTGGGGGAGCTGGACAGG	ATACCTGCTCAGCGTGCTTC
P12538_1	CGGGTTGGATTCCTATGGGT	GGGCCATTCCTACACTGAGG
P12553_1	AACCTCATTCAACGGGGTGG	GGGACTGGTGGTGATGAGTG
P12573_2	TGGCATCCCCAAACCTGTG	CCCAACCTTCAGTACAAAGCAAA
P12591_2	GGCTCTGTGTCATCTCCCAG	ATCTGCCTGCTTCAGTTCCC
P12616_1	AAAATCCTGCACAGATATCCATGA	ACCAGAAATGAGCTCAAAACCA
P12632_2	AAAGCATTTTCCTTTTGCTCCAT	GTTGTGCCCCATATCCATCCA
P12651_1	TCCAGCTTTAGGGTGATGCTC	AAGTGAGCCAACCCTTCCTG
P12666_2	CCCCAACGCTTCGATGTCT	GTAGAAAGCCACCTGTCCCC
P12682_1	ATGGGATTTGGGCTATGGGA	CTGATGGAGATGCTCACCCC
P12702_2	AGCATCTTCCCTTTCTTCTGGG	tgttgttAATTTGTGACAAAATTTCTGC
P12720_1	AGATGGTGCTGTATTATTTTTGTGAC	cgctgccaGAAGGAGTCTTT
P12738_1	TCGGAGCAGCTGGGAGAG	CCCGGTGTGAATTTGGTGGA
P12756_2	acgctaccCCGCTGGAAA	GTCTGGTTGGTGTGTATTCCCT
P12771_2	CGGAGCGCATCAAAACCTTT	GCCAAAGAGAGGTGGGGG
P12786_1	GGGCGAACCACGATGTGA	ACAGCCCAAAAGGTTCCTCC
P12803_1	GGAACCATTTTAGGCTCCAAGC	CACCAACCTTCCTCAATGCG
P12820_2	GTCGTTGTGGAGGAGAGTCC	TCATCCTGGGAGCAAAGCAA
P12847_1	GGCAGTGCCTGGTGAGAA	ACAGTGTGACCACGTATCAGG
P12865_1	ACCCAAAGCAGTTTTCTACCTC	CTGGAAGAAGAGGAGACAGTGT
P12883_2	CCAATTGGATTTGAGTTGGAGGT	TCCCCTCATCATTCATTTCTGCT
P12904_1	CATGTGCAGGACCCACACC	TGACCAAATCTGACACCATCCA
P12920_1	TGTTTAATTTGGGAGGAGAGACTC	GTGGGTGAGTCTTCTTCCCTG
P12946_1	AGGCCAACTTCCTTTGGTTCA	CACAGTTGGGTGAGTCCTCC
P12986_2	TTTGGAGGGAGGACTCACCC	AAAGTCTGGGTGAGTGCTGC
P13001_2	TCTCTCTACAAAAGAAAGGCAGAAAC	GCTCCTCTCACCACACACTG
P13020_1	TCCCATGGGAAGACCTTGAA	GTTCGGTGAGTCTTCCTCCG
P13038_2	TTCTGAAGCTAGTTTCTCTGCTAAA	ACCCTTCTCATCACGCATTTCT
P13060_2	GGCAGCACTCACCCAGATTT	TCAGGGACACTAGCTGCAGA
P13079_1	GTGCATGATGAACTGAACAGCT	TGGGAGCTGTGCAATTAGTCA
P13099_1	GGAGACTCACCCAACTTTGC	CTCCTTCCCCAAAGTGAGGG
P13116_1	AGCAGTGCATGGTCAGAGAG	TCTTGCCCAATCTGTTCTTTCC
P13135_1	CCCCAAATCTTTGTTCTGGTAAGC	CAGAGTGAGTCCTTCCAGCC
P13155_1	TGGCCTCAACCCATCACAAA	TGCCGTTTGATTGGGAATGA
P13191_2	CCCGACCATCCCTATCCCT	GTTCTGTGATGTCCCAAGGC
P13313_1	CACCCCACAGCAACACCTG	CTTCTTTCCAAATATTCACCCCCA
P13344_2	ggagaaggagatgatggagaagaT	TCTGTCTCTGTGGGGCTCTT
P13364_1	CACAGGCTGTGGGGCAAA	TGCACAAAGCTGCAATGGGA
P13393_1	CAGGAGAAGCTTTGCCATAGC	TTGCTCCAAGTGCAAGAGGA
P13749_2	TGGAATGCTGCCTGGCTC	TGGGGCTAAAGCATCACTGG
P13787_2	CACATTTTCAGGTCCCGTCC	GGAAATCCTCCTGGGTGGGA
P13804_2	TGGGGACAGAGCAGGCAG	CGTCTCACCCCAGGTTGTG
P13820_2	GCAGAGCTCTGTCCCATTCC	GGGGGACAGAAGCAGTAAACA
P13836_1	GAGCTCTTTTGCAAAGCCTTTC	GATCCCAACCACATTGCTGC
P13853_2	ACTTTGGAATTGTTGTGTGATCAC	GCTCTTTCACAGGGAGATCATT
P14013_1	TTGCAGTCCCTTCTCTTCCA	TGGGGCAGTTAAGGAGGAGA
P14037_1	CTGGGATAGTTTCATTGCTGCA	CGGATAACCTCTCCCTCCCT
P14064_2	TGATTCTTAGGGAGGGAGAGGT	TGCATGGTCACAAAATGGGC
P14079_2	CTTCCTGGTGCTGGCAGC	CACCTGCAGTTAAATGCCCC
P14096_2	AGACGGACACAGGCAATGG	GCCAGGGATAGACAATGAGAGA
P14111_2	ATGGGGGAAAGCACTGGTTT	ACTTCCACCCATCAGCAGTG
P14130_1	TGCCACAGAGGGAGGAATTG	CCCTCCCCTTTGTTCTCAAGT
P14149_2	GAGGGAAGGTAACAGCCGAG	CAACCAGTGCCTCAGGGAG
P14165_2	GGGAAAATTTGTGTTGGTTGTTGA	TTGGAACCCTCAGCACTCAC
P14188_1	CATAGGTCCCAGCCGTGG	CAAGGCCAGGTGCAAAGAAG
P14211_1	CATGGCTGATGGGCTGTG	GGTGGAGTTACTCATCATTAATGGG
P14226_1	TGGTTGTCCAAGCAGCAAGA	TCCAATCCAGTCGAAGGGAC
P14242_1	GCAGCTCCCACATTTCTCATC	ACTGAAAGAGCAGCCAAGGG
P14260_2	GGTGCTTCCTTGGCTGTGT	GCCCAATCCATCACCAAAGC
P14277_2	ACTCCTCAAAATTCTTCAAGGGATTTA	TCCCATGGATGCTCTTTGCC
P14293_2	GTCCCAGAGCCCCATGATCT	CTTCCCCACATCTCCTCACC
P14307_2	ACCTGTGAGTTCCCATCCTTG	cagacggacaggcagacC
P14328_1	TGTCTGTTTGATTTCACCACTGTG	GGTTCCTCCTTTTGCATCGC
P14342_2	GGCTCAGCTCCTCCCACT	CGGTCATTAGGAGTCAGACGG
P14357_1	CTCAGTAGCAACAGGAGGGC	GGCTGACTGCTCTCCCAGTA
P14372_1	CCAATTTTGGGGGCTATCCG	GGAGTGGTGGAGAGAGTCGA
P14390_2	TCGGCAAATTATTTATGTTTCGTGTTTT	CGTCGCGTTGTCTGCATATC
P14408_2	TTAAAGAACCCAAACCACCTTCT	TCAGCTCTGCCCGTCTCC
P14426_1	GTGGAGCCCGAGGGAGAG	GGTCAGAAAGGTGAGCGCT
P14492_2	CTCCCGCCCGTTCAGGAA	CGGCACAACTACGGGGTT
P14512_1	GGCACTCACCGCTCCTCT	CAGCGTTCTTCCAGTGGACT
P14527_2	GGCCACGTGTTTCCCCAC	CCTCGGGTGAGCTCGGAG
P14554_1	GAAGGGCTCCGGGGGTTT	CGAACTCTGCCTGGAGACG
P14580_2	GTCACCCGTCTCCAGGCA	AAGGGGCAGAGGGACAGAAA
P14600_1	TGCCGTGGTTACCTTTTCGT	TGACATTGGGAATGGCCAGG
P14616_2	CAATCATGTCCCCGGTGTCC	TGCATTGGGTGACATTGGGA
P14633_1	GCCTCCATGGGTTGGGAAAT	CTCTCTGTGTGGTGGTGTCC
P14652_1	CCTCACCAACCCAGGACTTC	TGCACGACCCAAAGAGGAAA
P14672_1	GGGGGAATGAGAATGGTGAGT	CTCATCCGTTGGCTCTACCC
P14687_1	TGGGTACACAGCATCATTAGGA	GCCTGGGACAATGGGAGATC
P14701_2	CCACAGAGGACAAAGGCCAC	TCTACAGCTGCGTTGTCACC
P14720_1	AGCATCCCAATACCTCCACG	CCCTTGGATGTGACGGTGAC
P14740_2	GCGGTGACCTGAAGTCCAG	GGTGGCATCATCCCATAGTTCA
P14761_1	GACATCGGTCCCATATAGCCC	ACATATGGGAGCAGGCGGTA
P14779_1	CCCCCACAGGAATATCACCC	ATCACCGGGGGATGAGGG
P14797_2	GTGGAGCTGCAGCACTGT	GTCCCCCTTTGTCCTCGAGT
P14814_2	CGGTGGAACTGTCATAGGCC	ATGTCCCTTCACCTCCCCAT
P14830_1	CACTGTGAGGACATGGGGAG	CTCTCCATGTCTCTGCAGCG
P14848_2	ATAGGGACACGGGGGACAC	TATCCCCCAAGTGTCCCTGT
P14863_1	GACGCAGGGATGCATGGG	CCCATTTGTCCCCTCCTCTG
P14881_2	ACTGGGATGTGTGGGGATATG	GCTCTGACCCATGGAGCC
P14903_2	CAGCAGCGCAGTGACACC	AAATGACCCCATTACGCCCC
P14920_1	CGAGTGGGGTCAGAGTCCC	CTCCCACCTCTCCAAAGTCC
P14934_2	AGCTATTGGGGCTAATGGGG	TACCCTCTCACGTCTCCCAG
P14952_1	GCGATAGGGACCTTGGGAAC	TCACCTTCAATGTCAGCGGT
P14966_1	GTCATGGGGGTTTGGGGG	GGCTCTGCTGGTCCCAATTT
P14987_1	AGTGCAGGACGGGCATTG	GAAGTGACGGAGGGGGTG
P15014_2	ATCGCTCTCCGCTGCTTTC	CTCCATGCAAACGCAGAAGG
P15038_1	ATTGGACCCTTCTGCGTTTG	TGATCCCTTCATGGTCATCCC
P15069_1	acacaagtccaggtagatgatatGG	CACCCGATGGTCCTCCAATG
P15126_1	CCTCGGGTGAGCTCGGAG	CCTGTCCAGAAACCTCACCC
P15144_1	CTGTGTGCCCTGACCGTG	AGAATCCCGTAGTTGTGCCG
P15162_1	GCGTCAAGCTGAATACTGGAAC	GGTAGAAGCCCGTCACGTAG
P15229_2	GGTCAGAAAGGTGAGCGCT	CATCGTGGCGACATCTCCAA
P15252_1	CTGAATTAGCTGCTGCCCCG	CCATCCCCACCAATCCATGT
P15268_2	CCCGTGAATCATTGGGGACT	GGTAACCACTGAGGGACCC
P15286_1	TGGTCCTCATATAGACTCCTCGG	CATCACTGTCTGGGCTGTCA
P15303_2	ATAACCCAAAGCCACCACCAG	CCCTCCTGCCCCACTGTTA
P15320_1	ACATGTTAAAGAATCGAAAGGTTGGA	GCTCTGCATCCCCCTTCC
P15340_1	GGGTTTTTATGTACAGGGGCC	CCCCCAGCAGGTTTTACTGT
P15355_2	tcttAAAAACCCCAAACCTTTTTCC	TTAAACCCCACAGCACCACA
P15375_1	GGGACCCCCAGCTGAGTC	GTGATCTGTGGTGGTGCTGA
P15395_1	CGCTGAGCCGTGAAACAG	GTGTGGGGCTGAACCTGAAT
P15410_2	CTGAGTTGAGCTGCCCGC	CCAACCCCGAGGAGATTGAG
P15428_1	GCTATAGGGTTTGCGGGGTT	AAGAAAGCAGCAAAAGCGGC
P15445_2	CTTCTCCCCGGGCAGTTTG	CAGCTCCGCAAAGCCAAG
P15461_2	CCATCAGGAAAATGAACCTCAGG	CTCACCCCCTGTCTCCCC
P15478_2	TTTGTGCTTCTCTGATTTCTTCTTTT	ggatgatgatgaggatgaGAGCA
P15498_1	GGTTGGCACGTTCCTCTTCC	ACCCCTCTGTGTCCTCTCTC
P15516_1	CGTCCTGCGGCTCATCAG	TGGCTTTGAGGTCTGCTCAC
P15531_2	CACATCGTGGTCGGGAGG	ACGCATGGCCCTTCTACAAG
P15549_1	GAGTCCCCAAGCGAACCTT	AAGGCGGCCAAAATCCCTG
P15564_2	TCAGAATCCCATTGCAGTATTTGA	CTCTGTGGGCTGTGCTGG
P15579_1	GCTGACGGGGAGGATTCAC	GTCAACATTCCCCACCCGTC
P15596_1	CATCTCCCACCTTGGCCAC	ACCTGGGGTTCTTTGGGTTG
P15612_1	GACACAGAGGAGACAGCTGG	TTTCGGTTGTCCCTGTAGCC
P15627_2	CGACGCTCCCTTCTTGTGG	CGGCGCTTGGAGAACAACTA
P15642_1	CACAGGATGCAGAGATGGCA	TTTGGGGGATGTTGAGCTCC
P15656_1	CCGTTTGATCGTCCCCATGT	TGAAGGTCCCCTACAGAGCA
P15671_2	CCCCAAAGTATCAGGACGTTGA	TGTGGCGCCCAAGGATTTAA
P15689_2	GCTATAGGGACAGCCAAAACAC	GTATGGGTGAGGTGACGCAG
P15708_1	CAAAACGCATTCAGGGCACA	GAGAGTGCCACAGGGACAG
P15729_2	CAGCTGCATCTCTGTGGTGG	TCTCGAACCCCAAAAAGCCC
P15747_1	GGCTGACGGAAAGGCCAA	TGCTCCCTTGCAGGATTCTG
P15765_1	GAAGCCCTCGTAAAGCAGCG	TGTAGTGCAGGCTGTCGTAC
P15785_2	AAGGAAGGTTGGAGCAAACAA	TGCCTGAGAAAGCAGCCC
P15805_1	CAGCTGGGAGAGGTGGGAT	CAGCATCACAAGGGCCCTTA
P15821_2	GACACAGCGGCCCCAGTA	CTTCAGGGACGTTGGGACTC
P15974_2	GGGGCCTGGATGGAGAGG	CCCAATCCGCCTCCATCC
P16089_2	CAGCCCCATAACCGTCCTG	AGGATTGCTTTGCAGAGGCT
P16129_2	CGGGGCCGTCACAATCAC	GAGGGGTTGGGAGAAAAGGG
P16173_1	GCGCGAACACCCAAACATG	CGCGAGGATGATATCGGGTT
P16197_2	CACTCACCTGAGCCGCTC	CAGCAACACCGGGCATCC
P16228_1	GGATGCCCGGTGTTGCTG	TACATCCCCACACGTGCATG
P16264_2	CAGTGCCTGGCATTGCAG	TTTGGGGGAAAAGCGTGAGG
P16292_2	CCTCACGCTTTTCCCCCAAA	CGGTTGCTAGGCAGAACAGA
P16319_1	CTGTTCTGCCTAGCAACCGA	AACTTCTTGCCCCAGTGCAT
P16342_2	CAAGGGGCTGTGCAAGGAG	TTGCAGGTGTACCCACTCTG
P16377_1	CCTGTCTGTGCCTGCAGAG	TGGCTTCAGGCATTGGGTT
P16403_1	AACCCAATGCCTGAAGCCAA	AAGGACAGCATCAATGGGGA
P16420_1	TGTGTTCTCAGTGGATATCCCC	GACAGCATCAGTGGGGACAG
P16437_2	CCATTGATGCATCCCCAATTGG	TGGGAATGCATTGTTGGGGA
P16453_2	ATCCCCAACGATGTGTCCTC	ATCAGAGTGTTGGGGTAGCC
P16477_1	GTGTCCCCACTGATGTGTCC	CGGGTGACAATGCAGGCATA
P16494_1	GATGGCGTCACCCACCTC	GAAGGGATGGGGTCCTGTG
P16515_2	GGTGGTGGGAGCAATGCTTT	GACAAACAAGGACACCGCG
P16532_1	GAGACAGCAGGGACACCC	CCATCAGGAGCACTGCTGC
P16548_2	GGGCATTGTCCCCATGGC	CATGTTGCACCCCAGAAAGC
P16566_1	GCGGGACAGCAGGTAGGA	AGAACCCCATGTTGTGCACT
P16583_2	GTGCAACGTGGGTTTGGG	CATGTGCACCACGAAGGC
P16602_1	GGTTTTGGGGTGCAGAATGA	CATTTAGGATGGCGGCGAG
P16620_1	TGGCCTTCAACAAGAACCCT	CATCACCCCATTGCAACACC
P16637_2	CTGGCTGCACAGTTCTGGA	AATTCCTTGCGTGGATCCCC
P16652_2	CTGCACGGGGATGTTGCA	TTCCCTTTGCAATGTCCCCA
P16669_1	TCATTGCATGAGGAACTGAGAG	GATGGGGACGATGCGGAC
P16689_2	TCCCACCAACCACCCTGC	GTCCTGTAGGTCCAGTCCCC
P16704_1	CTTCTACCCACCCGCAGTG	ATCATCGCCGGGGACAAATT
P16722_1	CAGGAGGACTGGAGTGAGTT	ATGAGGAGGTACACCCCACA
P16744_1	GTGCTGGGGACATGTGTGA	TCCAGTCATTGAGGTCCCCA
P16775_2	ctggtcctgctcctcggtT	GCCGTGGTAGCGTCATCTG
P16791_2	CTCCCAGTGCTCCCAGTG	CCCATAAAGCAGAGACCCCC
P16817_2	ggtttggggttggggtGT	CCCCCACAAATCATCCCCAA
P16831_2	CTCTGCTCTATGGGATCATGGT	TGAGACCCCCTCCAAACTCT
P16848_1	CAGGGAGGGCTTTAGGGTG	CCCCAAAGTGGCCCCAATAT
P16865_1	GGAGTGATGCTGAGGACTCA	CATGAAGGCACCTGCATTGG
P16885_1	TCGATGTTATGTCCCCATGGG	TGAGGGCAATGGCAATCTGT
P16904_2	CTACGACCCCGATGGCCA	CACATCTTCATGCAACATCCCC
P16923_1	ATTGCAAATGGGGCTGTTGC	CAACATCCCCATGCAGCAC
P16940_1	GGGTGCTGCATGGGAATGT	GTTCTTCAAAGCCACCGTCC
P16955_1	GGGGTTGATCCATGCAGC	TGCAATGCAATGTGCTCTGC
P16970_2	TGGGGCATTGCTTAAGGGTC	TCCCCATCTCACTTCCCTGT
P16989_1	GTGTGGCACAACGCTGTTG	CTGGGGTTCCCTGTCTGTG
P17012_1	CTGCTCACCATCCCTGTCC	TCCTCCAAGCTAGCATGCTG
P17031_1	CCAATGGGAACTGGACCTACC	GCCCCAACACCATCACTACA
P17056_2	TTGGGGCTCAGCTTGCTC	AGGGGTGAGTGGGGTTCTT
P17089_1	GACAAGAACCCCACTCACCC	AACAGAGGCTGCAGAGTGTC
P17106_1	ACCTTCTGTCACCAACTGTCC	ACCTCTGGGATCACCACTCC
P17123_2	GGTGATTGACATTGTGCACAGG	CAATGGGAAGGCAAGCAGTC
P17139_2	AGTGGTGATCCCAGAGGTTTC	CCCTCAGGTTGTGAAGCGAA
P17179_1	GCAACGGAGGAACCAATGGG	CAGGGTATGGAGCTCTGCG
P17200_2	CTGTGCCCGTGGGATCCT	GCGTCTGTCCATCCCAGTAC
P17215_1	GGACGGGGAACTCTTCGTG	GGATGGGTTGGGGTCCCC
P17236_2	CTCCGTGGGTGTGGGATG	CTTTCCCATCGTAGGCCACC
P17258_1	TGTTCGGCTGTGACATCCTC	accccACTCACCTCTCCTG
P17275_2	CTGAGGGGTGGAAGAGTTACC	CGGCAGGACAAGGTCAGGAT
P17289_1	TCAGCGTGGGGAGCTCAG	GGCACTGGTACTTATCCCCG
P17303_2	CTGAAGGACGGCGCAGTG	TCCAACACCAACCACGATGG
P17343_1	GGATCTGGGTCCCCCTTGG	TGGATCCACCTTCCCTGTCT
P17361_1	GGTACCCATTCCTGGTGCTT	GAAGAGATGGTGTCCCACGG
P17379_2	CTGGGCTATGCTGGGGCT	TGAAGGCAAGCTGAGACAGA
P17397_1	CACAGCCCCATCCTCTTGAC	AGAAGGAACGGGGGTACAGA
P17413_2	GGACCGTGTCCCAGTTTGG	GAAACAGGAGTGCTGTGGGA
P17428_1	TCCCTGTCCTGGCAGAACT	GTGTAGGGTACAATGTGGGGG
P17446_2	CAATCCTCACCCTTGCCCAC	TCCCGGTGCTGTAAGAAGTG
P17474_2	CCAACACACCCGGGTACAAA	GGGAGGGATAGCGGGAGTTA
P17493_1	GTGTCCCCACCTCCACCC	TGCAGTGCTGATGGTGACG
P17514_1	CCCCTCCAACACCACCAC	CAGCAGCAGGTGGGATGTC
P17531_1	CAGGAGTGGAGATAAGGGGAC	TCCATGGTCCCCTCCCAG
P17553_1	CCGGAGAGCTGTCCTCCC	GATGTCCCTGACACATCCCC
P17575_2	GTGGAGTGAGCGGGCAAA	TCAGCAGCCATCCTCATTGA
P17590_2	GACACAAGGATGGTTGGGGG	TCTGGTGGCCCTCGTGTC
P17607_2	TGGGGACATGTGGCTGCT	GGACAGAAGGACACAGCAGG
P17625_2	GCAGCTCCAGTGATACGCC	TGGATGTGATGGACAGGGTG
P17648_1	CCGCGCCCTCAATACCAT	CTCAGGGACAATGGCACCC
P17665_2	GTCCCCTGGCTGTGTCTCT	CTCTGTGTCCCCATGTCACC
P17681_2	GATCTTCTCCGAAGAGCCCA	CTGTGTCTCCAGGCCAATCG
P17698_1	GGAGGTGACACAGGGATGTG	GACCTCGTCACCTTCCTCCT
P17714_1	GGGGACATGCGGATATGGG	GATAGCACAGCTGTGGGACA
P17731_1	GAGGATGCCATGAGGTCACC	ATGATGGCATGGGGACTGTG
P17750_1	TCACTGCACCCTCCTGCC	GGGATGTGGGGACATGATAGG
P17765_1	GGCATTCTGTCCCCATCTCC	GCTTTGCCAATGAGGATGGG
P17782_1	ACACCACTGGTCCAGAGAGA	TCCCCTCCACGTGTTCTTTG
P17798_1	CCTGCGCCTTCTGCATCT	CCCCATGCCCCTTCCATG
P17813_2	GGTGGGCATGTGGAGGTG	ACCTCCATGTGCCTTTGGTC
P17834_2	ACATGGATAGGGCAATGAGTACA	CAGGGGATGTGGCCATGC
P17856_2	GCCAGATACCACAGCAGGA	GCTGTCACTGAGCTGGTGT
P17874_1	CTCGGTGATGCTCTGCCG	CTGTGGTGACAGGCGAGATG
P17894_2	CAGCAGCACCATGGGCAG	ggaatgaagatgggTTTGCGG
P17978_2	GGCTCAGCGAGAGGAGGA	CCCGCTCCGCCATTACTTT
P17992_1	AGCGACGCTGCTCATTGG	AGTCCCCATCAGATCCCTCC
P18006_1	CTGGAGGGGGCTGGAGAG	TGACAGGCGCAGAATGTAGG
P18027_1	GTGTGTTCCAGGTGCTGAGG	GTAGGGTCAGGAAGATGGCG
P18059_1	CCCGCCATCTTCCTGACC	AATGCGAGGAAGAGGAAGGC
P18075_2	GGGCAAAGGAGGCAGAGG	TGGGGTTTTGTGGAGGGATG
P18094_1	TGCTGTCGGCCTCATGTG	TGATGAAGGTGAAGAGGCCAC
P18124_1	GTGGCCTCTTCACCTTCATCA	CAGGTTCCTCAGCATGACGT
P18143_1	GGCTGACCACCGATGTGAC	CCACTTCCATTCCTGCTCCA
P18159_1	ACCGCACGGAAAGTCTATGA	GCCATTGAAGACCCGTACCA
P18178_2	GCGAGTACTTGGCCATCCC	GATGTCCCCATCCCACCTG
P18199_1	GGGACACAGAGAGGGCCATT	ATGTGGCCACAGTCATGGG
P18219_1	GCCTTCATCCTCTACCAGACT	CACCAGCACCCACAGCTC
P18234_1	TATCCTGGGTGCTGTGCCAT	TCTTCCCGCTGCCATTCAG
P18255_2	GCAAGATGTCACCTTCGAGC	GAGAAGAGCACGGGTTCCTG
P18270_2	GAGCACCGCTACCTGCAC	GATGAGTGGGGTCAGACACC
P18291_2	GGTGCTTTGGGCTTCATCTC	CTCACCATTGCATCGCTGTC
P18309_1	GCGTCCCACCGTCCTTATC	GTGTCCCCATCTCAGCCAC
P18326_1	GGACGGTGCTGCTCATCAC	CACATCCCAACCCACTCCTC
P18344_1	ATGGGATATGGGGAGCAGTG	CTCCCCAGCATTTGCCCTT
P18360_2	AGTGTTTGCCCTCAGTTGC	CCCATTTTGTCCATTCCTGATCA
P18391_1	ccgttgcagtgttctgtGTG	CTTCGTGTCCTGGAAGTGCT
P18406_2	GGAGAGGTGAGGGGGAGG	TCTGTGCTGTGGTTTGGGTT
P18424_1	GAGGAGGGCAGGGTGGTG	ACCACTACCCATTGTGCCAG
P18441_1	AATACACAGGGCATCAGAAGC	CAGTGTCCCCATCCCACATC
P18459_2	CGGGACTGGGGACAACAG	AGTGGCACTGCAGTCCATG
P18477_1	GCACATGGATGCCGAGCC	CCCTCCAGCCGTCTTCTAGT
P18493_1	ATCTCAGCGCGGGGAGTC	TTGTCCCACACCACTCCTATT
P18524_1	ggtggaaggaggagagggaA	CCTGTGCTGAGTACCCACTG
P18541_1	CAGCATGGGGTCACAGAGG	CCTCTCAGATGTCCCTCTGC
P18555_1	CTCACCCACCCCATCCCC	AGGGTTGGGATGTGAACCTG
P18571_1	GTCCATCACCGACCCCAAAT	GTCTCACAGCTGTTCCTCCC
P18589_1	CTGGGCAGTACCACCGAGA	CTGCAGGGAAGAAGGGGAAG
P18607_2	CCCTGAGAGAAAGTGGAGACC	TCGTGGTTGGTGTTGGATTCA
P18624_1	ACCCAGATGCCCCCACTG	GACGGGGACAAGTACCAGTG
P18651_1	CACGCGGCACTGGTACTT	AGGAGAGGTGAGCGGAGTG
P18683_2	CCCACTCCGCTCACCTCT	TTCAGGGTCTCACACAGTGC
P18703_2	CCATCGTAGGCTGCCTGAT	CTCCGTGGGTGTGGGATG
P18730_1	GAGCCCATCCCACACCCA	TACATCCGTACGGCGATGAC
P18749_1	CGAGCGGTGCTGTTGTAGT	GACTTGAGAGTGCAGCGGT
P18768_1	CCGGGGTGGGGTTATGGG	TTCGCTTCACAACCTGAGGG
P18785_2	TTTTCCTACTCCTCCGCCCC	ACTCCTCCTCTTCTCACGGC
P18807_2	GGGCCGTGTCTTTACCCC	GCATCGACCTCAGATGGACC
P18823_2	GACAGTGGTGTCCCCCAG	CCATACTCAGGGTCCTGGGA
P18848_1	tcctcctcttcctcactccC	AGCCCTCCCAGATCCCATAA
P18866_2	ACTAAGGGAGATTTCTGTGTGGT	CAAATGGGACTGGGAGGGC
P18885_2	CCATGGGGCTGTTGCTGG	AGATGTGAGGTGACATGGGTG
P18900_2	TGGGGACACCAGGGGATATG	ATGGGAGCTGTGGGCCTC
P18915_2	CATGTCCCCAGAGTTCCCC	AGGGATGGCTTTAGGGTTTGG
P18931_1	CAGTACCAGGAGTCTGCGTG	TGGGGGTGAATTTGGGGTAA
P18948_1	AATGCTCCAATTCCCCTAAATCA	GTGATGGTGACCAGGACAGG
P18963_2	ACCCAAAGTCCCCCAAATCC	GTCGCTCAGCACCGTGTC
P18981_1	CCTGTGGGGTTTGGGTGAC	TATGGCCACTGTAATGCCCC
P18999_2	GTGCGACAGGGGGCTATG	TAGCCCCTCCCATACACCTC
P19014_1	CTTAGGGGCCATAGGGGTCT	GAGCCCCTCTGGTGTCCT
P19033_1	ATAGGAGCCTATAGGGAACCACA	TTATGGGGAGGTATGGGGGC
P19049_2	TGGCACATACGGGCACAG	tttaggtggggatttgggGG
P19063_2	TGGCTTTGAGGTGCGCAT	GACCCCAAAGGACATCAGGG
P19079_2	aatcccaCCCAATCTTCCCC	AGGAGGTCCCCAGATGTCAA
P19099_2	CCCTACTGACCTTTGGAATCTCT	GGGAAAGGGGTGGGATCAAA
P19121_1	TTCCTGCGGGGTCTGGAG	CCACCTGCAGATTCGACCAC
P19136_1	CTCCCTGGAGGTGTCCCC	GTGGCCTCACTCCCACTTTG
P19154_2	GTTTTGGAGTTTCGTGGGGG	CGAAGAACCGCGCACTCT
P19170_2	TGGTGAGGAGGGGTCGTG	GCACACAGCTGCACTACCT
P19191_1	TTGTGTGAGGCCATGTGCAT	CCAGAAAGTGCACCAGGTGT
P19210_2	ATGCTTGAGACCCTCCTGTG	GGGACATTGATGGGGACGG
P19228_2	CAGAGTGACAGTGGGGGTGA	GCTGTCCTGCCTCCACCT
P19250_1	CACTCCATGCACTGTGGTG	gcaacaCATGACAGAGAAGTGC
P19312_1	tgcatTGCACACTAGGCATG	GGACACCCACCTGCTCATC
P19329_2	ATATCTCCACGTCGTCGCCT	CACCTGCAACCATGGATCCC
P19352_1	GGATCCATGGTTGCAGGTGC	CACCGGGATTTGGGGGATC
P19381_1	cccaacactcagagccctG	ATGTCCCCATCCCCACTCA
P19401_1	CCGATGCTGTTGGGATCTTT	TCCTCCAGCAGTTTCAGCAG
P19417_2	AGGTACTGATATGGGGACATTGAGAT	GATGAGGTGACATGGGGACG
P19434_1	CGTGTCTGTCTCTGTGTCCC	GGACACGTGTGGAGGTGG
P19453_2	CTCTTCCTGTCCCCATCTATGC	CTTCCGCCGCAGATTCTGT
P19474_1	CTGCCGAGACGCCTTCCT	ACAGCGGGGGACATCCTC
P19491_2	CCATTGGTGTGGGGAGGTT	GACACACGGGGACACACC
P19508_2	TGTTGGATGATGATGAGGACGT	GACACTGAAGGGCCATTGGA
P19526_1	CTGCTCCCTGACTCCATCAC	GTCCTGTGTCACCGTCACC
P19544_2	CGGAATGTCCCTGTGTCCC	CAGGGCAAGTATGGAGCACA
P19564_1	CGTAAGCCCTATAGAGACCCC	CCGGGTGTCTAAGGGGGTAT
P19580_2	TGCGTTGCCCCATAGATACC	GGGCAGCTCCAGCATCTG
P19605_1	gacggtgacactgtcggC	GCTTTAAGGGACCCCAGAGG
P19623_1	CGAGTCCTGCATGTCGAGG	CACCATTCCCACCAAGGACA
P19640_2	CCTGTGTCCATGGTGGCC	CGGCTCCGCTTATCTGTAGG
P19654_1	CTGAGGGAGAGCTGCACC	CTATGCCCACCACCACATCC
P19670_1	GACGTCCCTGCAGAGATCG	GTGAGCACATGTGGGGACA
P19699_1	GCTCACATCCTTATTACATCCCCA	AGCAGAGAGTCCCCTATCCC
P19723_1	tccccacaccatccccatAT	ATTGCCCACCCCATAAAGCA
P19738_2	ATGGCACCCACTGCTGCT	ACCTGGAGCACTGCACATC
P19760_2	tgatttatgggtttgcatttCTCCT	ACTATCCCCATGTCCCCACA
P19774_2	CTGATGTCCCCACAGGCTTC	GGCAAATAGGGCCGGGAC
P19790_1	TGTGAGGACATCATAGGGACAT	GACATTGCAGGGGGAGATCC
P19808_2	CCCAGATGGCGCCTTCTT	ATGAGGACCAAGACACAGGG
P19829_1	GTGTCGCTGACGGCCTTC	GACACAGAGGGATGAGGGGA
P19846_2	CCATATGTTCCCATACCCTGCT	AGGGATTTGTCCTGTGGCAG
P19867_2	CCTCCCCGTGTCTCTTCATG	GGACAGAGGTGCCACCAC
P19881_1	GCATTGGCACTGGTGGACA	TCAGGAGAACAAAATTGAAGAAGAATT
P19898_1	TTCACTCTCATTCGAATCCTTCAA	ACTTGAAGAGAACATGAAGAAGAGT
P19913_2	ACTCTCGATCAAGTTCTGCAGAT	GGATGGCCAGAAGGTTGCA
P19931_1	CGTGACCCCATATGACCCC	CACCTGCGTGGAGTGGAAG
P19948_1	GTGGAGGCGACGGGTTAC	CAGCCCCATTGTGTTCCCA
P19964_1	GGGTGATTTGATCCCCAGGT	GTCCAGACATGTCCCCAGTG
P19982_1	GGTGGCACTCAGGTTATGCT	CTCCACCTGCACTGTCACTG
P19996_2	TGGGGGCATGGTAGGACAT	ACAGCGTGACACCATGATGG
P20016_1	TGGTGTCATCTCCAAGACCG	cTGCTGGGGGTTGGGATATG
P20034_2	CGGCCCCATCCTGTACCA	CTCGTGGGCAGGGTTATGTG
P20049_2	cctaaggagggggaggagC	GATCTCCACCACCGCCATC
P20069_1	CGGGTCTTCCTGCTGATGG	TCACAACACCCTCAAACCCC
P20087_1	TGAGGGGAGTTATGGGGTGT	GGACAGCAGCACCCAGATAC
P20103_2	GAGGGTGTTGGGGTGTGC	TGGGATATGGTGTGGGGACA
P20119_1	ACTGGATCAGTCACTATGAGTTGG	CATAGATGGCTGCCATTGCC
P20139_2	CGAGCGGCAGTGTCTCAG	TACCTTGGGCGCATTCACAG
P20156_2	GCCGATCTGACCCCTCCA	AGGGACCCAAAACACAAGGT
P20171_2	TAGGGCCCCCATCCAGTGA	GCAGTGATTTGGGATCTCACC
P20191_2	GCCCAAAGGAGGACACAGG	GTTCTTGGGGTCAGAGGGAC
P20208_2	ACAGCTGCACACTGTACCC	TCACCTTCAAGCAGCACCTC
P20223_2	CCTCTGATACAATAACCCCCGT	CCAGTGCTCCCAGTATACCC
P20242_2	TGGGAGAGGCAGGGAGTAC	CCCTGCACCAGTACACACC
P20263_1	TACTGGGAAAGCTGGGAGGA	TGGGGTTAGGAACACTGGGA
P20280_1	CTGAGGGGCGGTGAGAAG	TGCGGAACTCCTGCAGTTG
P20297_1	CACTCATGGGTGGAGGAGGT	TTGATCACAACACGGTCCCA
P20316_1	ACTGTTGGATCAGTTGGGATCA	CTGACTCTGTGGTGGCTCG
P20331_1	ATCACACTGTGGTCAGCTGG	CTACGGGCTGCACTCACC
P20351_1	CGCGCGATTCGAACTCCAG	CTCTGATAGCGGCGGATCTC
P20370_1	GGAGCCTTTATCACCGCTGT	AGATCTCATTTTGGGGCGGG
P20392_1	CCCCACACACATCCAACGT	GGGGTCTCATTTTGAGGGGG
P20410_2	CCCCAACTGGACCTTTCAAAAA	TCATGGGAGGTGACGAGGG
P20432_1	CAGGGACACCACATCCTTGA	CTCCTGTAGGGCCAATAGGG
P20449_1	ccAGGTGCGGGAGATCTG	ACCCCAAAATCCACTTCCCC
P20470_2	GGTGCTGGGGAGCTCTCTA	ACCCCACAAATGCCAATCCT
P20488_1	TTGAGGTTATGGTTTTGGGGAG	GCTGCAGGTCTTTGGGGTAC
