# Supplementary material for: Genetic Diversity of MHC B-F/B-L Region in 21 Chicken Populations
Source: Front Genet. 2021 Aug 13;12:710770. doi: 10.3389/fgene.2021.710770 (PMC8414643; doi:10.3389/fgene.2021.710770)
Supplement: Supplementary Table 2 — The number of SNPs and INDELs in 18 genes. [file Table_2.XLSX]

## Sheet: number
	line 63		line72		BY		CH		CS		DG		DX		GS		LX		NY		RJF		SG		SK		TB		WC		WD		WL		WS		XB		XY		YY
Gene	snp	indel	snp	indel	snp	indel	snp	indel	snp	indel	snp	indel	snp	indel	snp	indel	snp	indel	snp	indel	snp	indel	snp	indel	snp	indel	snp	indel	snp	indel	snp	indel	snp	indel	snp	indel	snp	indel	snp	indel	snp	indel	Gene
BTN1	1	1	1	0	114	14	149	10	96	14	151	12	147	12	167	19	136	10	154	14	74	5	102	13	111	12	160	18	146	14	149	14	119	14	130	16	139	19	166	17	142	15	BTN1
BTN2	1	1	5	1	93	6	106	6	92	5	124	7	108	3	135	6	114	4	141	5	56	3	90	7	84	2	119	2	118	9	126	7	110	3	104	4	133	8	125	6	124	7	BTN2
BG1	1	0	2	0	44	4	42	3	26	3	56	3	49	6	58	6	51	4	70	5	28	1	40	3	40	3	56	4	58	4	53	4	51	5	70	4	58	6	62	8	50	3	BG1
BLEC2	4	0	0	0	20	0	23	1	13	1	24	1	24	1	20	0	26	1	30	1	16	1	28	1	20	0	22	1	25	1	14	1	19	0	30	1	30	1	18	1	11	0	BLEC2
BLEC1	3	0	8	2	57	3	77	5	55	4	61	3	66	3	85	4	60	5	92	7	35	1	65	1	52	0	68	3	81	6	88	2	56	3	80	2	87	5	80	6	79	3	BLEC1
BLB1	5	0	4	0	12	1	14	1	13	1	10	0	17	0	18	0	11	0	17	1	8	0	13	0	5	1	16	2	20	0	17	0	12	1	13	0	21	1	16	1	13	0	BLB1
TAPBP	5	0	1	0	38	2	36	2	29	3	31	2	37	1	44	2	41	3	56	4	15	0	43	4	26	2	38	2	53	3	51	2	37	1	36	1	60	2	56	2	40	2	TAPBP
BLB2	6	0	7	0	13	0	12	0	6	0	3	1	14	1	16	1	10	1	18	0	12	0	11	1	14	0	17	0	23	0	10	1	12	0	9	1	15	1	7	0	20	1	BLB2
BRD2	9	1	13	0	72	2	76	2	76	2	74	3	81	3	103	2	85	4	106	2	39	1	62	2	53	1	94	3	89	2	92	3	56	2	89	5	103	2	97	3	81	2	BRD2
DMA	0	0	0	0	11	0	9	1	13	0	17	0	10	0	17	1	16	1	20	1	10	0	9	1	10	0	14	0	17	1	12	1	16	1	11	0	19	1	24	0	15	0	DMA
DMB1	2	0	8	0	32	2	27	3	28	1	30	1	34	2	44	3	29	1	40	2	15	0	21	1	18	1	29	1	24	1	39	1	30	2	30	2	43	2	27	1	35	1	DMB1
DMB2	2	1	0	0	29	2	38	2	31	7	36	1	43	5	48	5	48	4	51	5	18	1	37	4	22	3	46	1	50	1	52	2	32	2	43	4	60	2	42	4	41	2	DMB2
BF1	7	0	19	1	58	10	49	2	41	9	67	10	61	9	71	7	56	7	80	9	21	2	50	8	46	3	55	7	65	7	74	6	55	4	52	5	69	7	70	7	65	5	BF1
TAP1	7	0	1	0	52	2	57	2	48	2	58	3	60	2	77	1	58	1	85	2	30	1	57	2	46	0	72	0	75	1	74	1	58	1	70	2	59	2	68	2	66	2	TAP1
TAP2	12	0	14	0	66	0	66	0	58	0	83	0	71	0	96	0	71	0	117	0	30	0	69	0	63	0	81	0	87	1	95	0	58	1	82	0	102	1	91	0	98	0	TAP2
BF2	9	1	9	0	60	4	54	3	47	2	39	3	51	5	78	3	45	5	68	2	40	3	68	5	42	2	62	8	73	6	51	2	40	2	56	4	63	4	63	2	63	4	BF2
C4	50	3	45	3	212	13	209	9	183	5	233	9	202	10	285	12	192	9	307	10	99	4	190	11	166	11	232	9	232	13	255	11	182	10	245	9	268	9	270	10	242	12	C4
CENPA	3	1	2	3	8	1	7	1	7	1	13	0	8	0	7	3	10	0	6	1	5	1	5	4	4	0	3	0	6	1	4	0	8	0	10	1	7	1	8	1	7	2	CENPA
BF2																																											BF2
	151	17	171	9	159	17	82	9	81	10
